# Supplementary material
Source: publisher site journal article supplement (https://www.dovepress.com/article/250592)
Supplement: Supplementary file 1 [file get_supplementary_file.php]

**Supplemental Table 1** Procedure of microwave digestion methodology

| **Procedure** | **Power (W)** | **Temperature**  **(° C)** | **Pressure (atm)** | **Duration (min)** |
| --- | --- | --- | --- | --- |
| 1 | 900 | 160 | 30 | 10 |
| 2 | 1000 | 180 | 30 | 30 |

**Supplemental Table 2** Recoveries rate of 7 elements in the selected serum sample

| **Element** | **Recovery rate (%)** | | |
| --- | --- | --- | --- |
| **Sample 1** | **Sample 2** | **Sample 3** |
| Cu | 103.53 | 100.20 | 105.17 |
| Zn | 104.29 | 101.46 | 99.75 |
| Fe | 95.45 | 97.83 | 95.24 |
| Mg | 98.28 | 98.84 | 101.27 |
| Ca | 106.41 | 98.24 | 96.56 |
| Se | 109.24 | 102.21 | 104.32 |
| Mo | 98.77 | 95.18 | 102.49 |
